# Supplementary material
Source: PubMed Central journal article supplement (PMC3720150)
Supplement: supp_13-11878_IOVS-13-11878-s01.pdf [file supp_13-11878_IOVS-13-11878-s01.pdf]

Supplementary Video S1.

The beginning of the video illustrates the development of the two breakup spots in Figure 6. The end of the video illustrates the bursting bubble in Figure 2. Fluctuating dark ring surrounding the center of the lipid image is an artifact.

Supplementary Video S2.

This illustrates the development of breakup and the growing semicircular patch of lipid in Figure 8. Bright vertical line at lower right of lipid image is an artifact.
